# Supplementary material for: DNA Methylation and Chromatin Organization in Insects: Insights from the Ant Camponotus floridanus
Source: PubMed Central journal article supplement — Genome Biol Evol. 2015 Feb 26;7(4):931–42. doi: 10.1093/gbe/evv039 (PMC4419788; doi:10.1093/gbe/evv039), 2015-02-26
Supplement: supp_evv039_chipVmeth.Supplement.GBErev.FINAL.pdf [file supp_evv039_chipVmeth.Supplement.GBErev.FINAL.pdf]

**DNA methylation and chromatin organization in insects: insights from the ant  
*Camponotus floridanus***

Karl M. Glastad, Brendan G. Hunt, Michael A. D. Goodisman

**Supplementary tables and figures:**

**Table S1:** Percentages of genes that were significantly methylated and also marked by a given hPTM, as well as over- or under-representation of hPTM enrichment among methylated genes as determined by a Fisher's exact test (all Fisher's exact test P values  $\ll 0.0001$ ).

|                 | <b>% methylated that are also marked by hPTM</b> | <b>% marked by hPTM that are also methylated</b> | <b>Fisher's exact test significant direction</b> |
|-----------------|--------------------------------------------------|--------------------------------------------------|--------------------------------------------------|
| <b>H3</b>       | 81.1                                             | 70.8                                             | over                                             |
| <b>H3K4me3</b>  | 80.6                                             | 79                                               | over                                             |
| <b>H3K4me1</b>  | 27.2                                             | 80                                               | over                                             |
| <b>H3K27me3</b> | 1.2                                              | 23.4                                             | under                                            |
| <b>H3K27ac</b>  | 85.8                                             | 69.5                                             | over                                             |
| <b>H3K36me3</b> | 79.6                                             | 79.6                                             | over                                             |
| <b>H3K9me3</b>  | 1.5                                              | 3.3                                              | under                                            |
| <b>H3K9ac</b>   | 67.3                                             | 42.1                                             | over                                             |
| <b>PoIII</b>    | 49.5                                             | 66.1                                             | over                                             |

**Table S2:** Spearman’s rank correlations between fractional DNA methylation and histone modification normalized tag enrichment at genic features (“TSS-proximal” represents a 2kb length-normalized gene measure 500bp upstream of TSS to 1.5kb downstream of gene start). P < 0.0001 for all listed correlations.

|                 | <b>TSS-proximal</b> | <b>Exon</b> | <b>Intron</b> |
|-----------------|---------------------|-------------|---------------|
| <b>H3</b>       | 0.599               | 0.307       | 0.185         |
| <b>H3K4me3</b>  | 0.621               | 0.417       | 0.290         |
| <b>H3K4me1</b>  | 0.158               | 0.361       | 0.182         |
| <b>H3K27me3</b> | 0.162               | -0.086      | -0.143        |
| <b>H3K27ac</b>  | 0.596               | 0.376       | 0.349         |
| <b>H3K36me3</b> | 0.617               | 0.459       | 0.202         |
| <b>H3K9me3</b>  | -0.564              | -0.448      | -0.319        |
| <b>H3K9ac</b>   | 0.272               | -0.153      | -0.052        |
| <b>PoIII</b>    | 0.464               | 0.121       | 0.134         |

**Table S3:** Numbers of HMRs associated with specific gene features. Genic: intersecting any gene annotation (gene set model or valid cufflinks transcript). Proximal: falling within 2kb either up- (5') or downstream (3') of any gene annotation. Non-genic: HMRs not falling within 2kb of a gene annotation. Non-genic HMRs were further divided into those which showed experimental evidence of expression (>4 RNA-sequencing reads mapped to HMR) despite the lack of a gene annotation, and those without (without RNA-seq).

| <b>Feature</b>         | <b>HMR count</b> |
|------------------------|------------------|
| <b>Genic</b>           | 6927             |
| <i>exonic</i>          | 4447             |
| <i>Intronic</i>        | 2480             |
| <b>Proximal</b>        | 433              |
| 5'                     | 100              |
| 3'                     | 333              |
| <b>Non-genic</b>       | 22               |
| <i>with RNA-seq</i>    | 8                |
| <i>without RNA-seq</i> | 14               |
| <b>Total</b>           | <b>7382</b>      |

**Table S4.** Association tests between a genomic region's differential methylation status (whether it is a DMR or unchanging methylated region) and differential ChIP enrichment (differentially enriched between castes or not) for the 8 factors assessed in this study among windows with sufficient DNA methylation and differential enrichment data.

|                 | <b>DMR status</b> | <b>% nonDiffChip</b> | <b>% DiffChip</b> | <b>N</b> | <b>P value</b> |
|-----------------|-------------------|----------------------|-------------------|----------|----------------|
| <b>H3K27ac</b>  | nonDMR            | 48.44                | 51.56             | 5850     | NS             |
|                 | DMR               | 47.98                | 52.02             | 2728     |                |
| <b>H3K27me3</b> | nonDMR            | 60                   | 40                | 597      | NS             |
|                 | DMR               | 55.88                | 44.12             | 300      |                |
| <b>H3K36me3</b> | nonDMR            | 29.65                | 70.35             | 5501     | <0.0001        |
|                 | DMR               | 25.61                | 74.39             | 2722     |                |
| <b>H3K4me1</b>  | nonDMR            | 85.9                 | 14.1              | 2128     | NS             |
|                 | DMR               | 86.22                | 13.78             | 849      |                |
| <b>H3K4me3</b>  | nonDMR            | 43.9                 | 56.1              | 5917     | <0.0001        |
|                 | DMR               | 38.63                | 61.37             | 3219     |                |
| <b>H3K9ac</b>   | nonDMR            | 69.69                | 30.38             | 2946     | 0.0031         |
|                 | DMR               | 65.21                | 34.79             | 1602     |                |
| <b>H3K9me3</b>  | nonDMR            | 58.11                | 41.89             | 101      | NS             |
|                 | DMR               | 55.56                | 44.44             | 85       |                |
| <b>PoIII</b>    | nonDMR            | 47.31                | 52.69             | 4170     | NS             |
|                 | DMR               | 48.15                | 51.85             | 1942     |                |

NS, non-significant

**Table S5:** Comparisons between differentially methylated regions and overlapping differentially enriched ChIP calls (using standard data from 'consolidatedCIs' file). P value from likelihood ratio test. Percentages reflect the percent membership a given row shows in the associated column.

|                                          |                 | Differential methylation call |        |       | P value |         |
|------------------------------------------|-----------------|-------------------------------|--------|-------|---------|---------|
|                                          |                 | Male                          | Worker | NA    |         |         |
| <b>Differential ChIP enrichment call</b> | <b>H3K27ac</b>  | % Male                        | 46.23  | 54.3  | 50.78   | 0.0004  |
|                                          |                 | % Worker                      | 53.77  | 45.7  | 48.22   |         |
|                                          |                 | N                             | 928    | 1606  | 4525    |         |
|                                          | <b>H3K27me3</b> | % Male                        | 95.52  | 92.47 | 92.33   | NS      |
|                                          |                 | % Worker                      | 4.48   | 7.53  | 7.67    |         |
|                                          |                 | N                             | 67     | 93    | 313     |         |
|                                          | <b>H3K36me3</b> | % Male                        | 88.25  | 89.5  | 87.4    | 0.0068  |
|                                          |                 | % Worker                      | 11.75  | 10.5  | 12.6    |         |
|                                          |                 | N                             | 2196   | 3112  | 7981    |         |
|                                          | <b>H3K4me1</b>  | % Male                        | 30.77  | 32.65 | 31.21   | NS      |
|                                          |                 | % Worker                      | 69.23  | 67.35 | 68.79   |         |
|                                          |                 | N                             | 91     | 147   | 487     |         |
|                                          | <b>H3K4me3</b>  | % Male                        | 78.45  | 84.97 | 78.71   | <0.0001 |
|                                          |                 | % Worker                      | 21.55  | 15.03 | 21.29   |         |
|                                          |                 | N                             | 815    | 1942  | 5077    |         |
| <b>H3K9ac</b>                            | % Male          | 90.97                         | 80.85  | 83.1  | 0.0145  |         |
|                                          | % Worker        | 9.03                          | 19.15  | 16.9  |         |         |
|                                          | N               | 144                           | 329    | 728   |         |         |
| <b>H3K9me3</b>                           | % Male          | 40.48                         | 26.83  | 33.33 | NS      |         |
|                                          | % Worker        | 59.52                         | 73.17  | 66.67 |         |         |
|                                          | N               | 42                            | 41     | 87    |         |         |
| <b>PoIII</b>                             | % Male          | 54.5                          | 63.2   | 59.1  | 0.0010  |         |
|                                          | % Worker        | 45.5                          | 36.8   | 40.9  |         |         |
|                                          | N               | 556                           | 1333   | 3579  |         |         |

NS, non-significant

**a)**

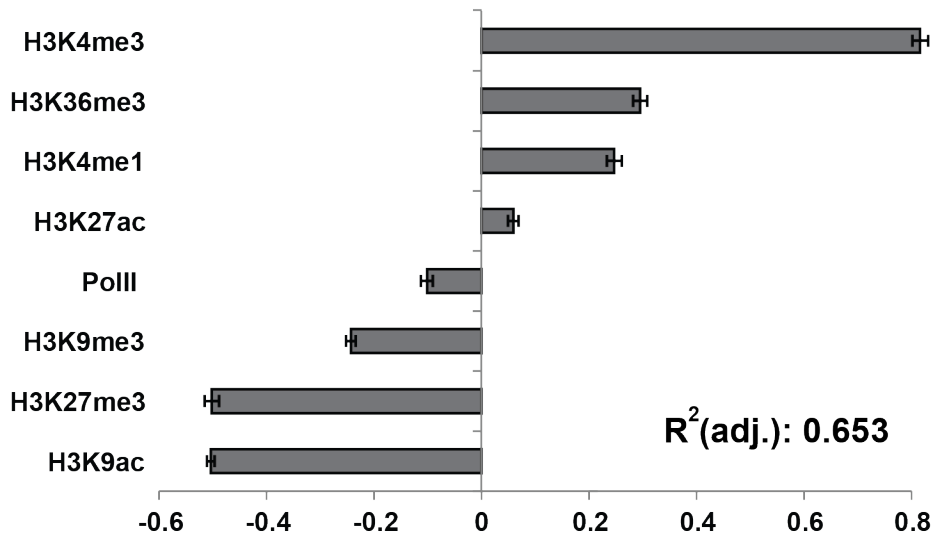

**b)**

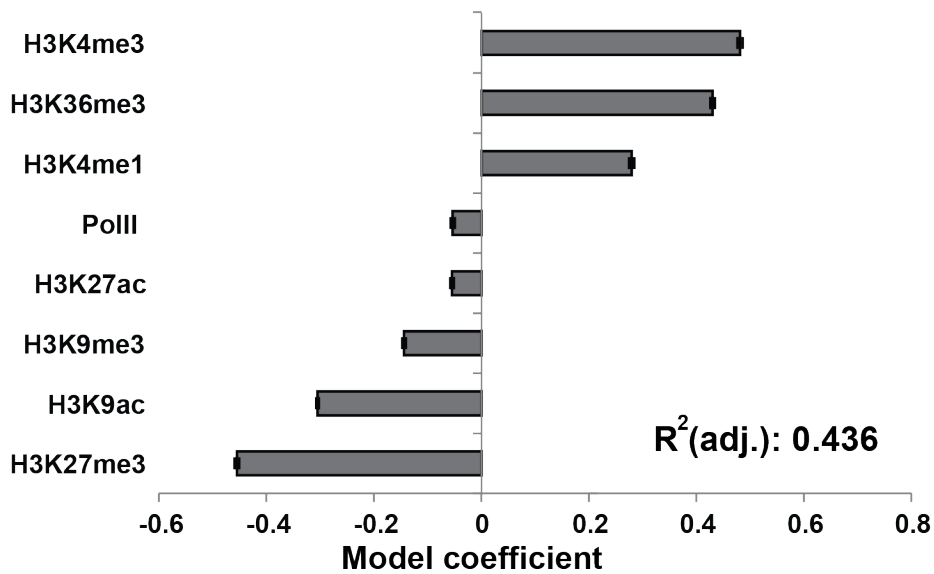

**Figure S1:** hPTM levels explain DNA methylation variation. Model coefficients for multiple regression of hPTM enrichment levels against DNA methylation levels within the same feature for a) CDS, and b) exons+introns (as distinct features) as the dependent variable. Magnitude of bars represent estimated model coefficients. Error bars represent standard error.  $R^2$  values given represent adjusted  $R^2$  for full model fit.

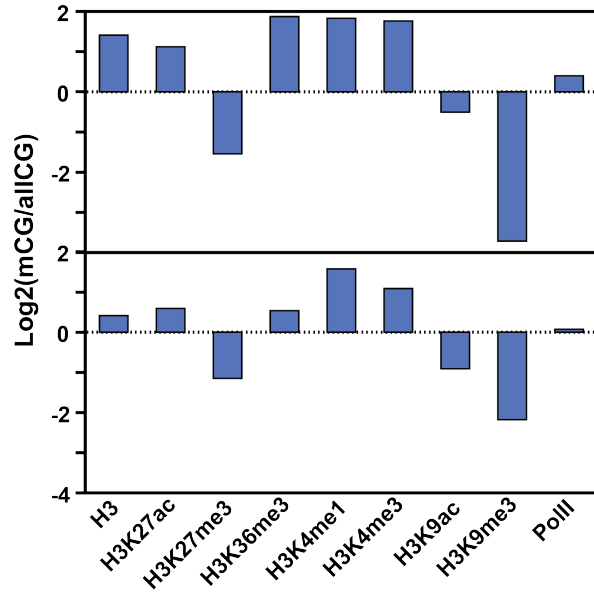

**Figure S2:** Methylated CpGs are strongly over- or under-represented among regions significantly enriched for different hPTMs. For both a) within all gene bodies, as well as b) within only methylated gene bodies the log<sub>2</sub>-transformed ratio of the proportion of methylated CpGs (mCGs) falling within the given hPTM-enriched regions to that of of all CpGs (allCGs) falling within the same regions is given.

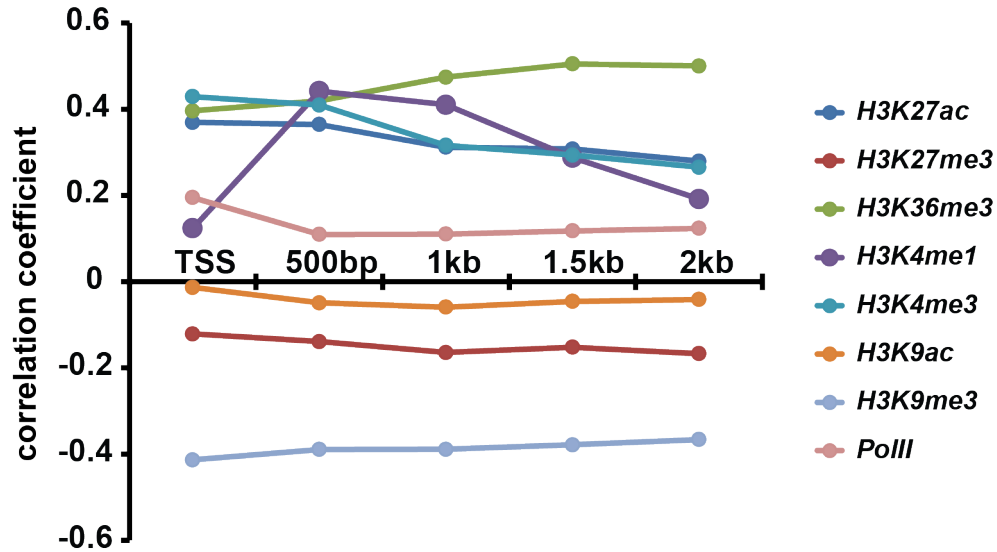

**Figure S3.** DNA methylation is correlated with hPTM enrichment at a fine spatial scale within genes. The correlation coefficients for spearman's rank correlations between DNA methylation and hPTM enrichment for each hPTM for 500bp windows downstream of gene TSSs are shown. Each point represents the correlation between DNA fractional methylation and the given hPTM tag fold enrichment within a 500bp window starting the given distance (x axis) from the TSS (eg TSS=0-500bp from start of TSS). Only genes longer than 2.5kb were used. All correlations are significant ( $P < 0.05$ ).



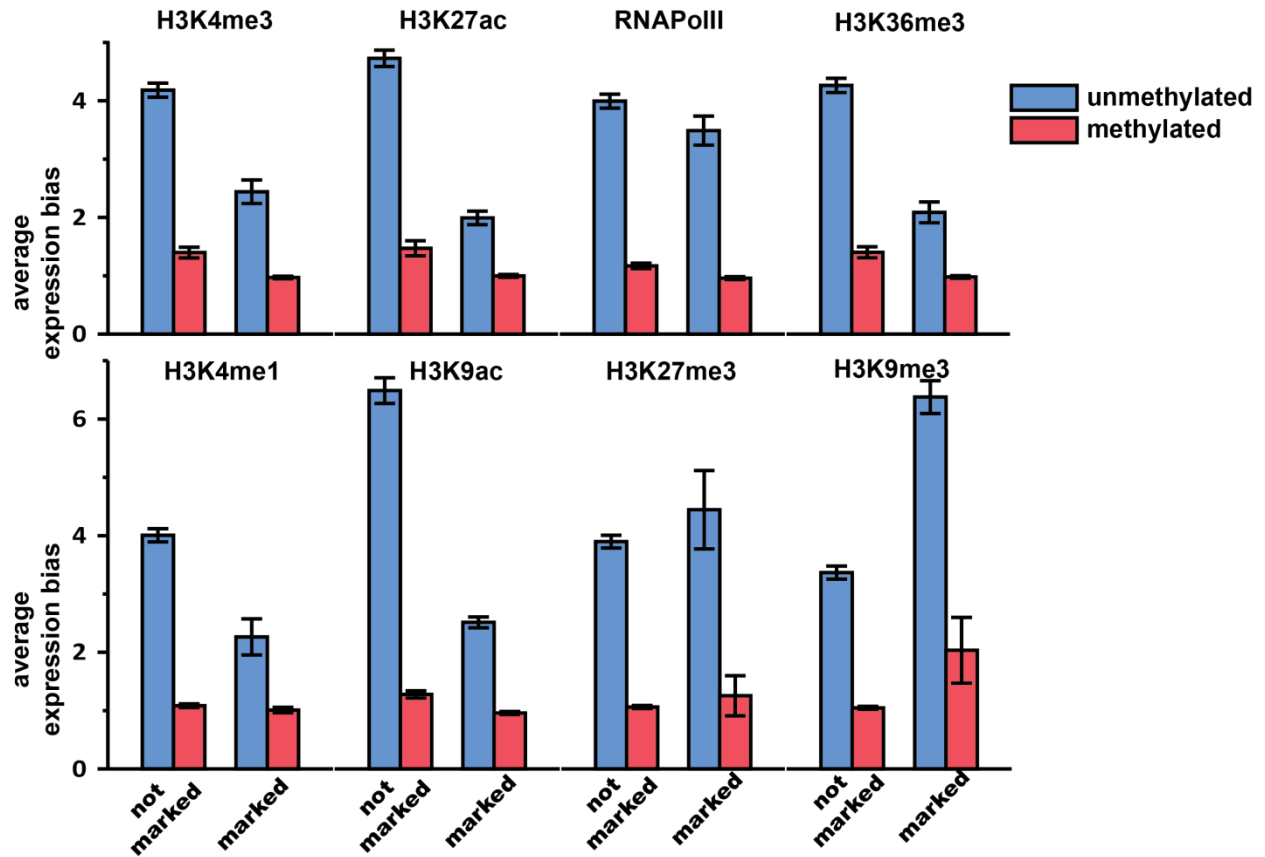

**Figure S4:** Levels of expression bias (average of absolute  $\log_2(\text{FPKM})$  ratios for 3 comparisons) of genes associated with histone modifications. Methylated genes exhibit consistently lower levels of expression bias relative to unmethylated genes.

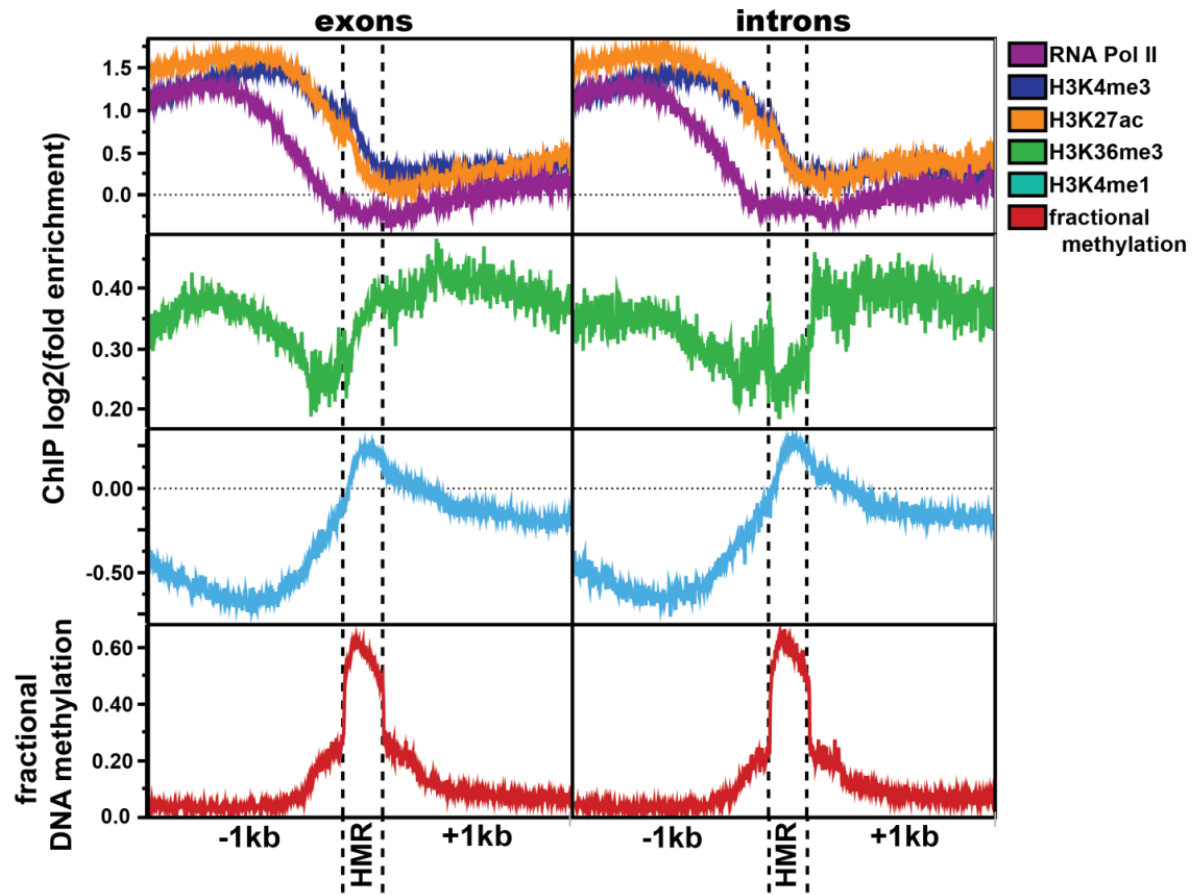

**Figure S5:** Chip profiles as they relate to highly methylated regions (HMRs) localized to exons and introns. Shown ChIP measures correspond to those in Figure 3 of the main text.

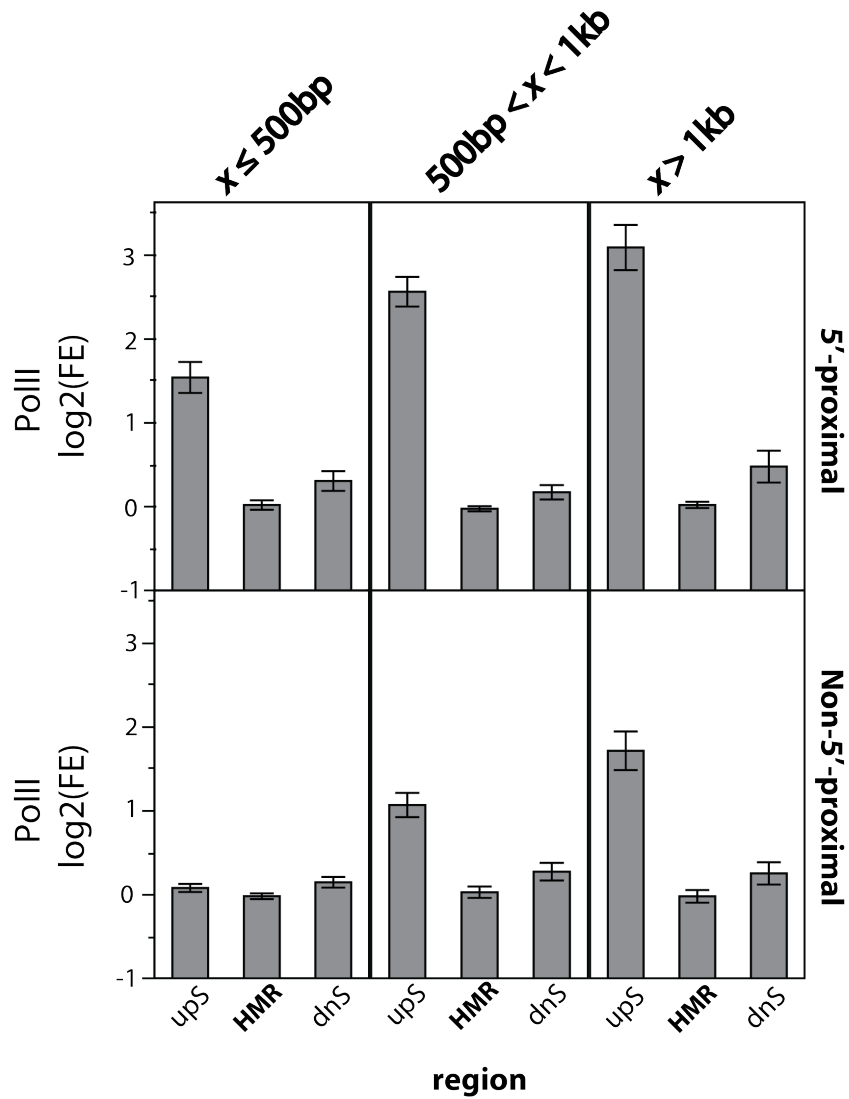

**Figure S6:** RNA polymerase II ChIP enrichment (log<sub>2</sub> fold enrichment over input) within highly methylated regions (HMRs) as well as 1kb regions in the 5' and 3' directions (upS and dnS, respectively), split both by HMR proximity to a gene start, as well as grouped into 3 HMR length classes. All comparisons are significant below the p<0.0001 level.

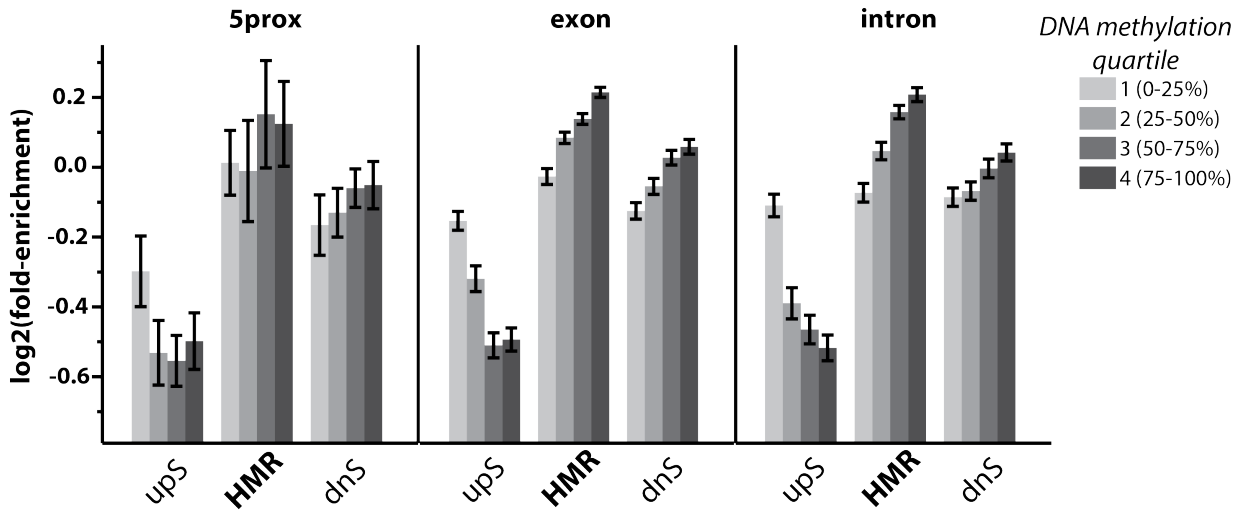

**Figure S7:** H3K4me1 is enriched within highly methylated regions (HMRs), independent of genic context. H3K4me1 values shown for HMRs, and 1kb bins up- and downstream (upS and dnS, respectively) of HMR for HMRs overlapping the region -2kb-0kb from gene starts (5prox), exons, and introns. HMR DNA methylation levels were split into 4 equally-sized ascending quartiles to illustrate opposite relationship between DNA methylation level and H3K4me1 enrichment between regions upstream of HMRs and HMRs themselves.
